# Supplementary material for: Achieving Net Zero Carbon Dioxide by Sequestering Biomass Carbon
Source: Preprints.org preprint supplement (doi:10.20944/preprints202007.0576.v3), 2020-11-17
Supplement: Supplementary file 1 [file Supplemental Input.docx]

Supplemental Input

Achieving Net Zero Carbon Dioxide by Sequestering Biomass Carbon

Jeffrey A. Amelse a,b

a) Universidade de Aveiro, Departamento de Química, CICECO, 3810-193 Aveiro, Portugal

b) Independent Contributor

**SI.1. Calculation of the Amount of Air With 400 ppmv CO2 Needed to Grow of 1 Acre of Corn**

The calculation is provided in the spreadsheet attached below. It takes about 0.85 acres of air from sea level to the end of the troposphere to feed the growth of 1 acre of corn.

**SI.2. EXCEL files that Calculate Urban Tree Growth Parameters in 10 Year Increment**s

EXCEL files that calculate tree growth parameters from the allometric equations provided in the USDA report [42].
